# Supplementary material
Source: PubMed Central journal article supplement (PMC6750895)
Supplement: jm9b00454_si_001.pdf [file jm9b00454_si_001.pdf]

## Supporting Information

### ***De-novo* design of cereblon (CRBN) effectors guided by natural hydrolysis products of thalidomide derivatives**

*Christopher Heim*<sup>1</sup>, *Dimanthi Pliatsika*<sup>2</sup>, *Farnoush Mousavizadeh*<sup>2</sup>, *Kerstin Bär*<sup>1</sup>, *Birte Hernandez Alvarez*<sup>1</sup>, *Athanassios Giannis*<sup>2\*</sup>, *Marcus D. Hartmann*<sup>1\*</sup>

<sup>1</sup>Department of Protein Evolution, Max Planck Institute for Developmental Biology, Max-Planck-Ring 5, 72076 Tübingen, Germany

<sup>2</sup>Faculty for Chemistry und Mineralogy, Institute of Organic Chemistry, University of Leipzig, Johannisallee 29, 04103 Leipzig, Germany

**Figure S1.** HPLC traces of tested compounds

**Figure S2.** Western blot quantification and normalization IKZF3

**Figure S3.** Concentration response curve for IKZF3 mAb

**Table S1.** Molecular formula strings and Ki values of tested compounds.

\*To whom correspondence may be addressed: [giannis@uni-leipzig.de](mailto:giannis@uni-leipzig.de) (AG) or [marcus.hartmann@tuebingen.mpg.de](mailto:marcus.hartmann@tuebingen.mpg.de) (MDH)

4a

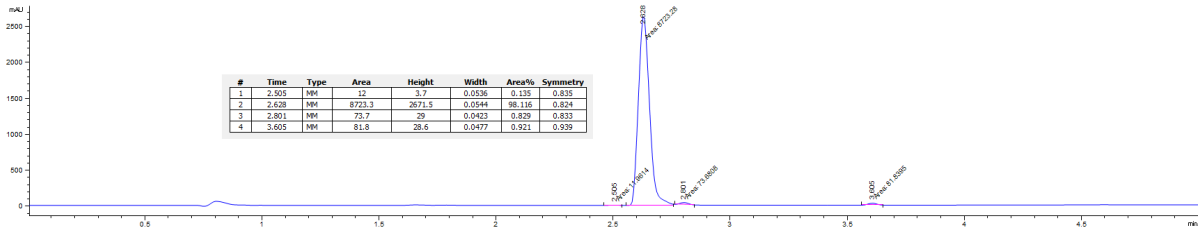

4b

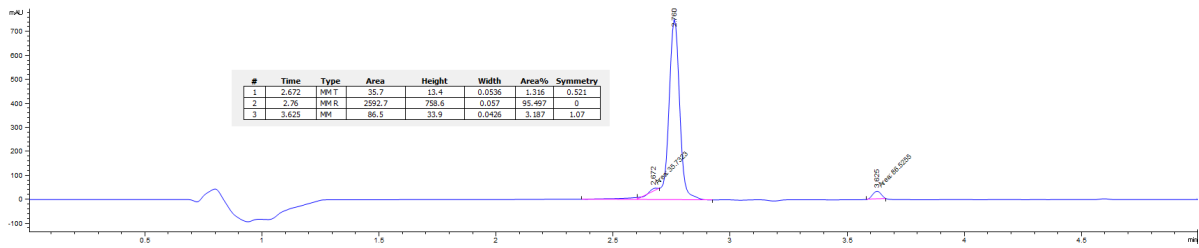

4c

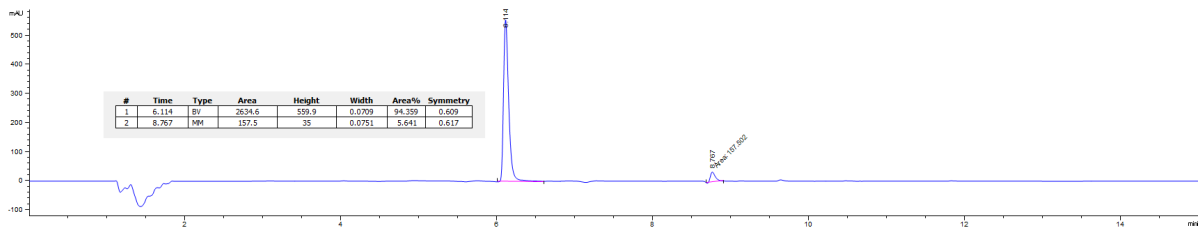

4d

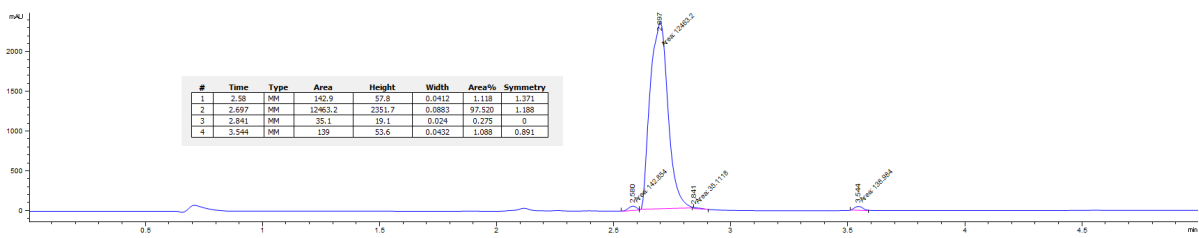

5a

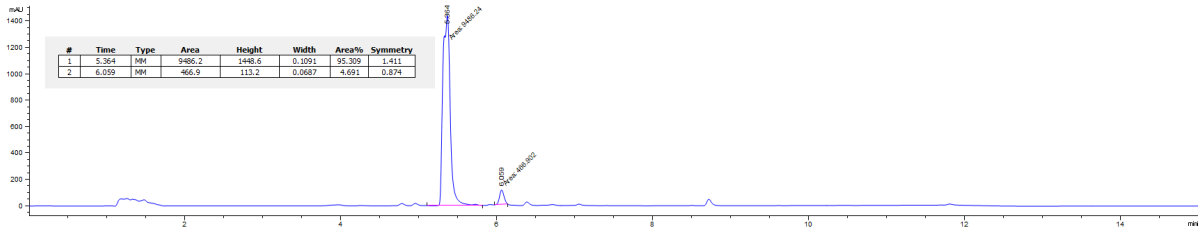

5b

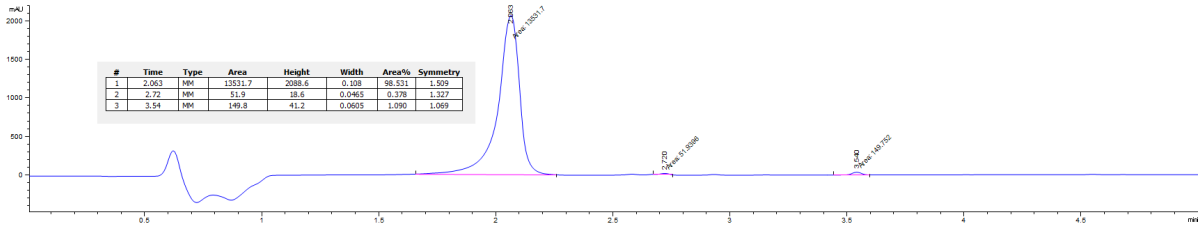

7a

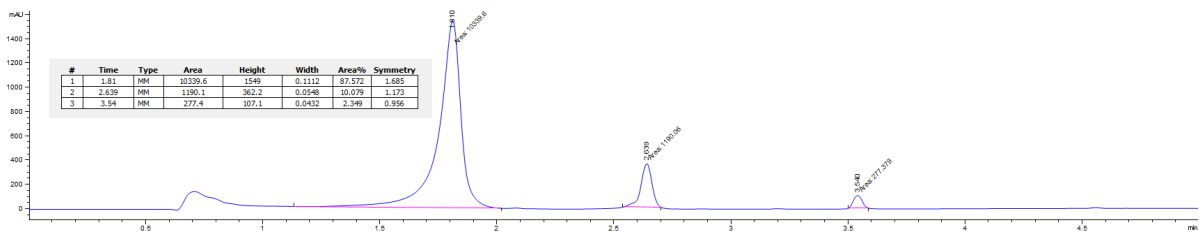

7b

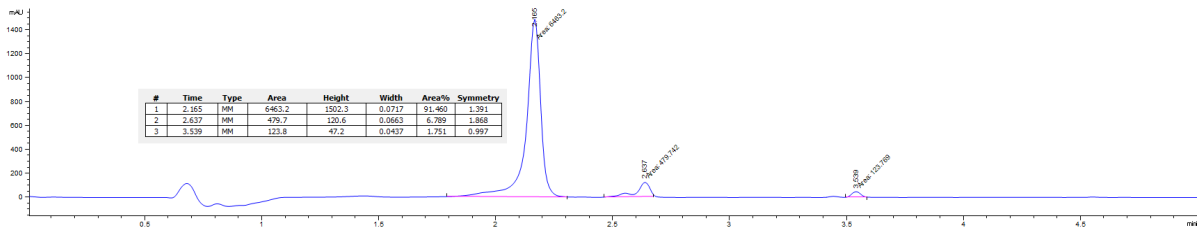

7c

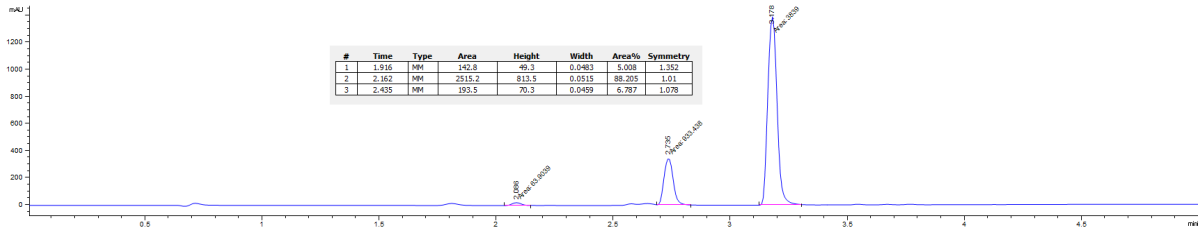

7d

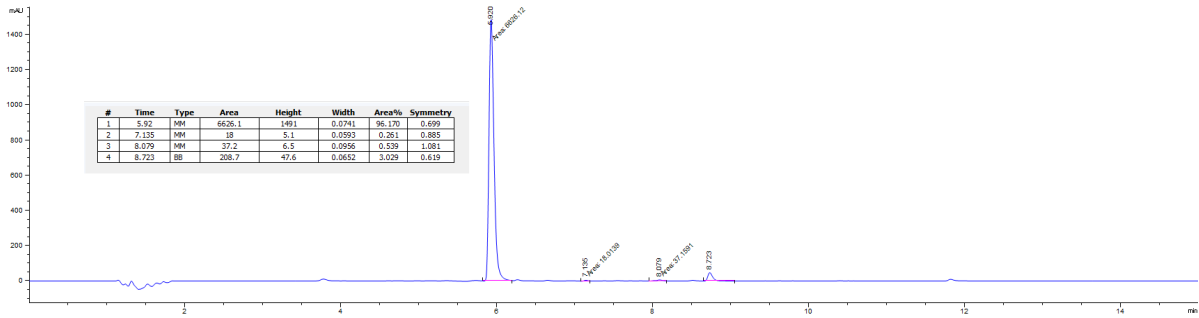

7e

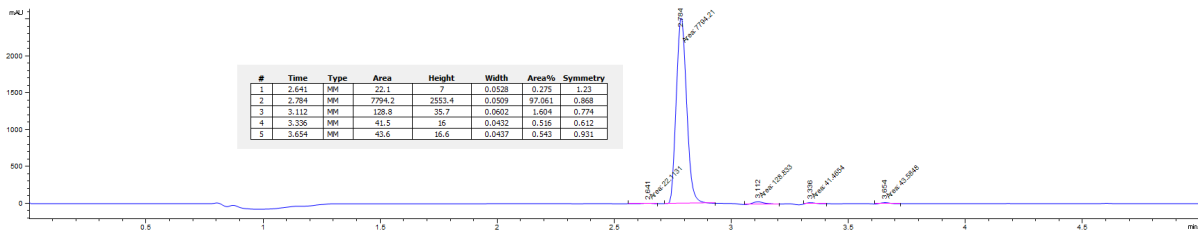

7f

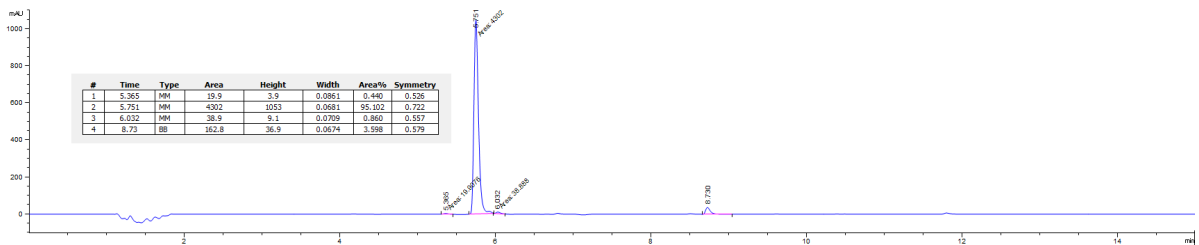

7g

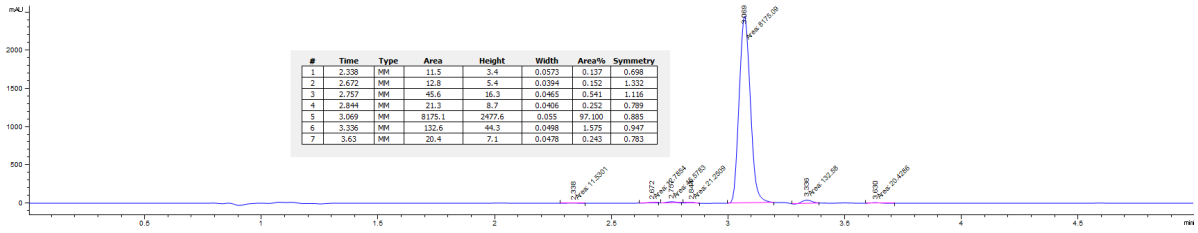

7h

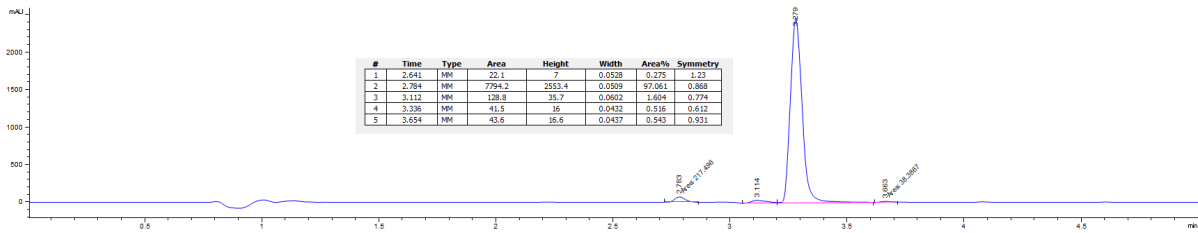

11a

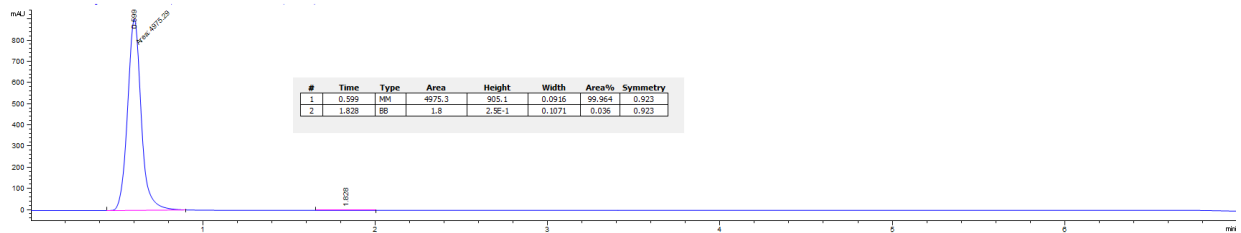

11b

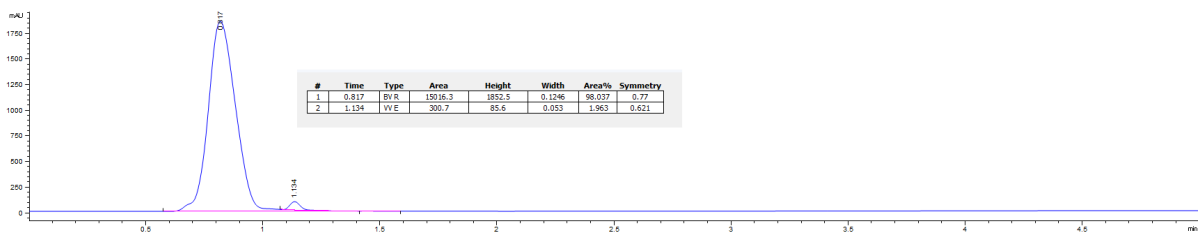

12a

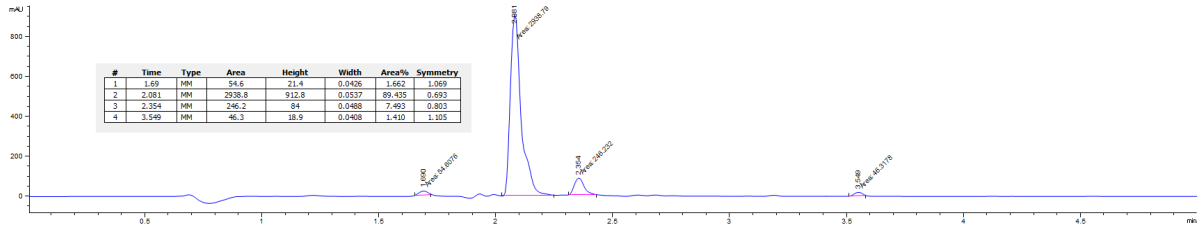

12b

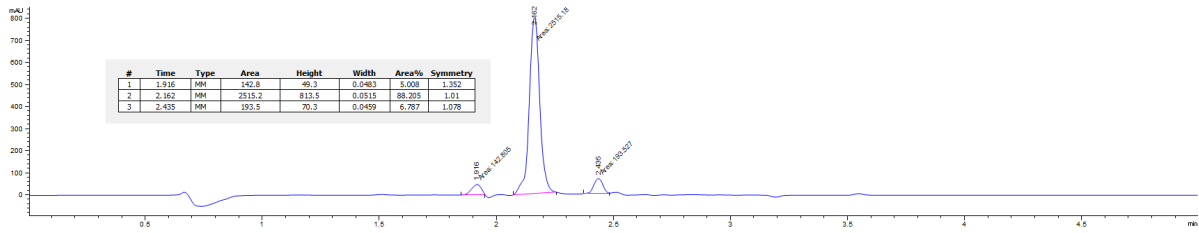

16a

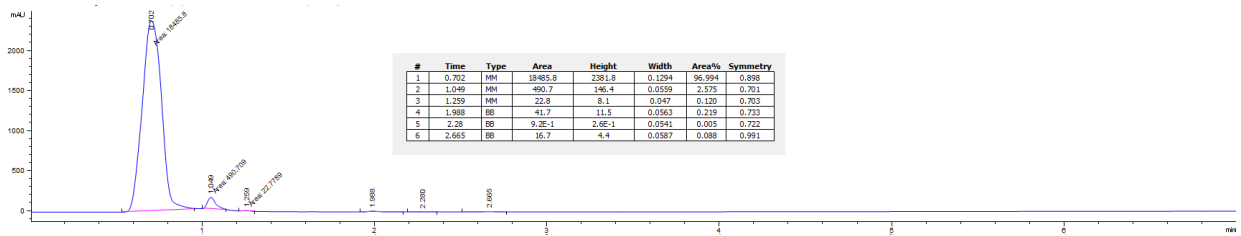

16b

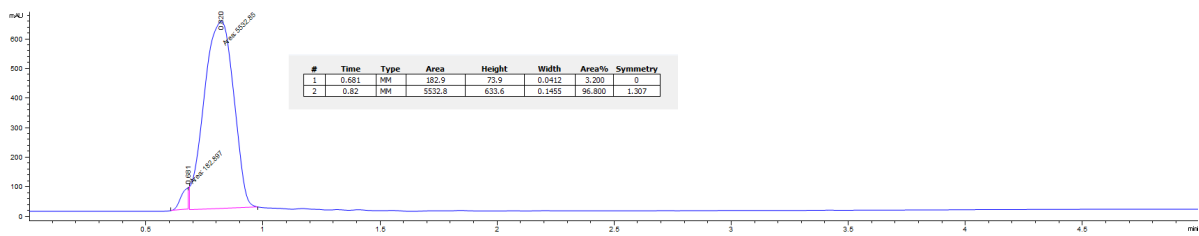

20b

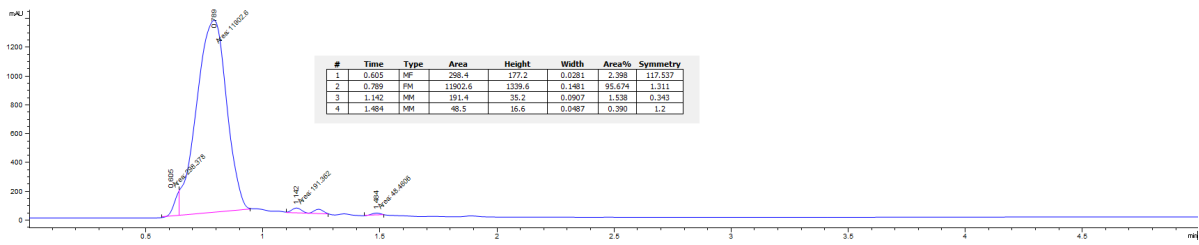

Figure S1. HPLC traces of tested compounds

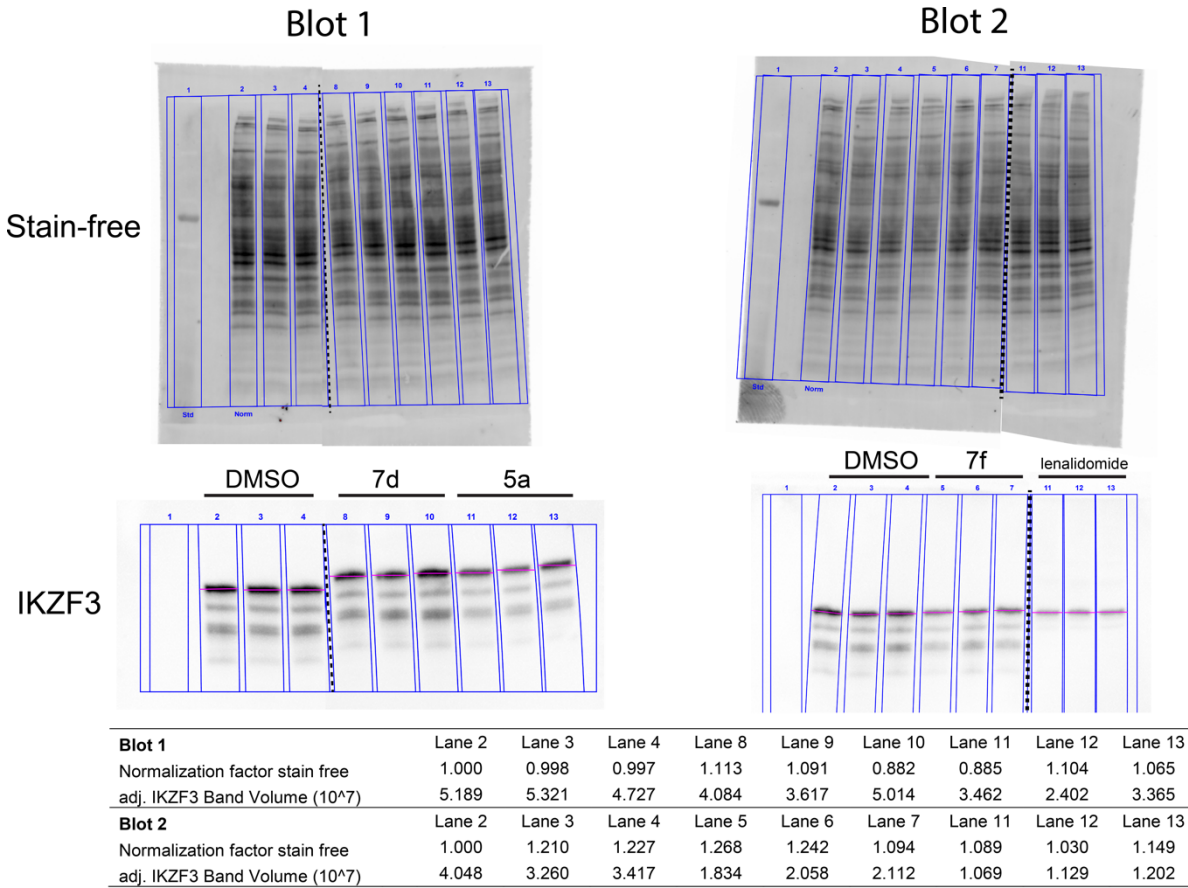

**Figure S2.** Quantification of IKZF3 from treated OPM2 cells by western blotting. Upper panels show stain-free images of PVDF-membranes; the same immunoblots stained with anti-IKZF3 mAb are depicted in the lower panels. Blots were cropped at indicated lines. The table shows the normalization factors and the adjusted (adj.) band volumes for IKZF3.



**A**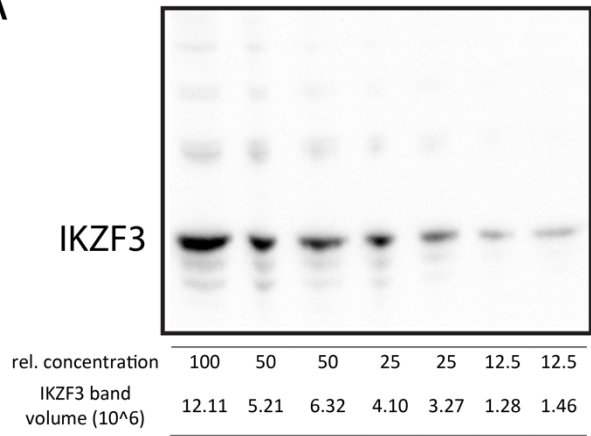**B**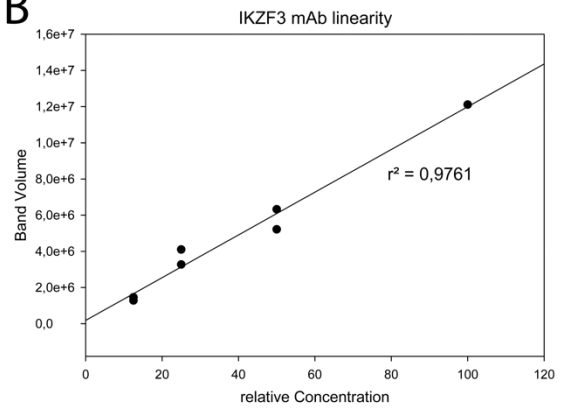

**Figure S3.** Concentration response curve for IKZF3 mAb. **A** Immunoblot for detection of IKZF3 in a dilution series of OPM2 cell extracts and integrated band volumes. **B** Resulting concentration response curve of the IKZF3 mAb.

| Compound | SMILES                                                       | K <sub>i</sub> (μM) |
|----------|--------------------------------------------------------------|---------------------|
| 4a       | <chem>O=C3CC(n2c(=O)c1cccc(N(=O)=O)c1c2=O)C(=O)N3</chem>     | >40                 |
| 4b       | <chem>O=C3CC(n2c(=O)c1ccc(N(=O)=O)cc1c2=O)C(=O)N3</chem>     | 11 ± 1.8            |
| 4c       | <chem>O=C3CCC(n2c(=O)c1cccc(N(=O)=O)c1c2=O)C(=O)N3</chem>    | >40                 |
| 4d       | <chem>O=C3CCC(n2c(=O)c1ccc(N(=O)=O)cc1c2=O)C(=O)N3</chem>    | 9.0 ± 1.6           |
| 5a       | <chem>Nc2cccc3c(=O)n(C1CC(=O)NC1=O)c(=O)c23</chem>           | >40                 |
| 5b       | <chem>Nc3ccc2c(=O)n(C1CC(=O)NC1=O)c(=O)c2c3</chem>           | 12 ± 0.7            |
| 7a       | <chem>C/C(C)=C\C(=O)NC1CC(=O)NC1=O</chem>                    | >40                 |
| 7b       | <chem>O=C(Cc1cccc1)NC2CC(=O)NC2=O</chem>                     | >40                 |
| 7c       | <chem>O=C2CC(NC(=O)c1c(Cl)cc(Cl)cc1Cl)C(=O)N2</chem>         | 9.0 ± 1.5           |
| 7d       | <chem>O=C2CC(NC(=O)OCc1cccc1)C(=O)N2</chem>                  | 4 ± 0.4             |
| 7e       | <chem>O=C2CC(NC(=O)c1cc(N(=O)=O)cc(N(=O)=O)c1)C(=O)N2</chem> | >99                 |
| 7f       | <chem>O=C(/C=C/c1cccc1)NC2CC(=O)NC2=O</chem>                 | 20 ± 2.6            |
| 7g       | <chem>O=C3CC(NC(=O)c2sc1cccc1c2Cl)C(=O)N3</chem>             | >40                 |
| 7h       | <chem>O=C3CC(NC(=O)c2sc1cccc(Cl)c1c2Cl)C(=O)N3</chem>        | 20 ± 5.8            |
| 11a      | <chem>[NH3+]Cc2ccc(COC(=O)NC1CC(=O)NC1=O)cc2</chem>          | 12 ± 1.7            |
| 11b      | <chem>[NH3+]Cc2ccc(COC(=O)NC1CCC(=O)NC1=O)cc2</chem>         | 10 ± 0.8            |
| 12a      | <chem>O=C(O)CCC(=O)NCc2ccc(COC(=O)NC1CC(=O)NC1=O)cc2</chem>  | 12 ± 2.0            |
| 12b      | <chem>O=C(O)CCC(=O)NCc2ccc(COC(=O)NC1CCC(=O)NC1=O)cc2</chem> | 36 ± 10.5           |
| 16a      | <chem>[NH3+][C@@H]2CC[C@H](COC(=O)NC1CC(=O)NC1=O)CC2</chem>  | 20 ± 2.0            |
| 16b      | <chem>[NH3+][C@@H]2CC[C@H](COC(=O)NC1CCC(=O)NC1=O)CC2</chem> | 5.0 ± 0.5           |
| 20a      | <chem>O=C2CC(NC(=O)OC[C@@H]1CCC[NH2+])C(=O)N2</chem>         | insufficient purity |
| 20b      | <chem>O=C2CCC(NC(=O)OC[C@@H]1CCC[NH2+])C(=O)N2</chem>        | 45 ± 15.7           |

**Table S1.** Molecular formula strings and K<sub>i</sub> values of all compounds.
